# Supplementary material
Source: PubMed Central journal article supplement (PMC3503452)

# Supplementary Figure

A

BT

E2

10% Serum

-

+

ER

DAPI

Merge

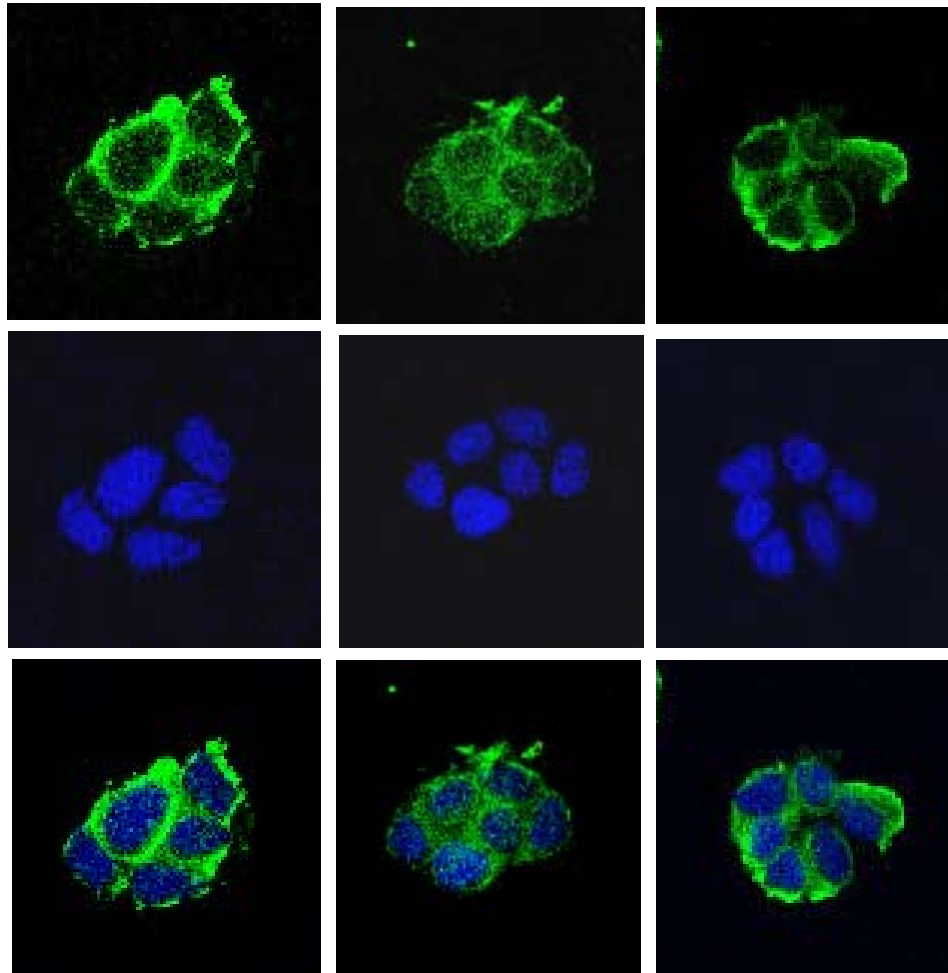

BT/HerR1.0

B

E2

10% Serum

-

+

ER

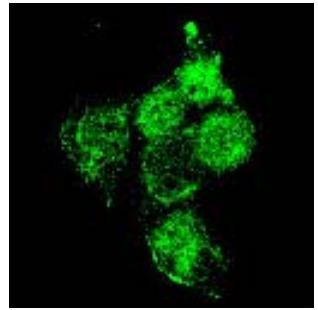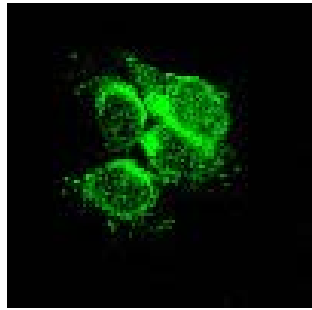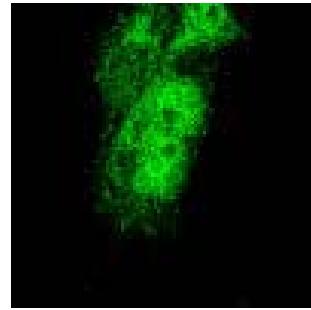

DAPI

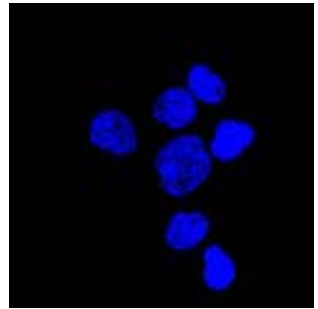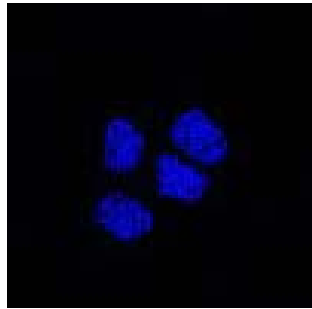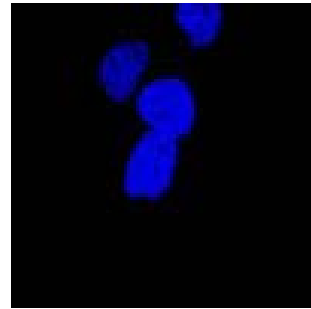

Merge

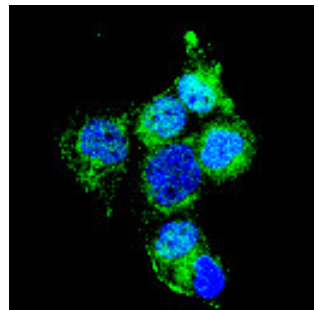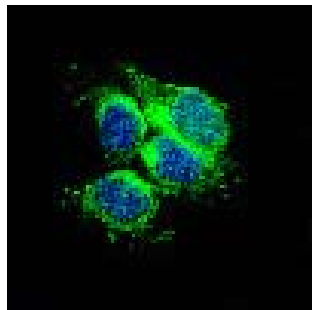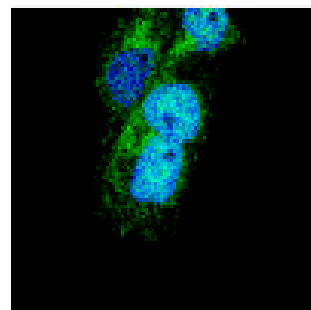

Supplement: NIHMS368261-supplement-Figures_A_and_B.pdf [file NIHMS368261-supplement-Figures_A_and_B.pdf]
